# Supplementary material
Source: publisher figshare collection journal article supplement (https://acs.figshare.com/ndownloader/files/4415698)
Supplement: Supplementary file 1 [file 4415698]

## **Supporting Information:**

# **The Effects of DHLA-capped CdSe/ZnS Quantum Dots on the Fibrillation of Human Serum Albumin**

Charles H. Vannoy and Roger M. Leblanc\*

Department of Chemistry, University of Miami, 1301 Memorial Dr., Coral Gables, FL

33146-0431

E-mail: [rml@miami.edu](mailto:rml@miami.edu)

| <b>Index</b> |                                                     | <b>Page</b> |
|--------------|-----------------------------------------------------|-------------|
| Figure S1.   | TEM Image of DHLA-capped QDs                        | S2          |
| Figure S2.   | UV-vis and Fluorescence Spectra for DHLA-capped QDs | S3          |
| Figure S3.   | Congo Red Absorption Differences                    | S4          |
| Figure S4.   | Fluorescence Spectra for Trp Fluorescence           | S5          |

## TEM Image of DHLA-capped QDs

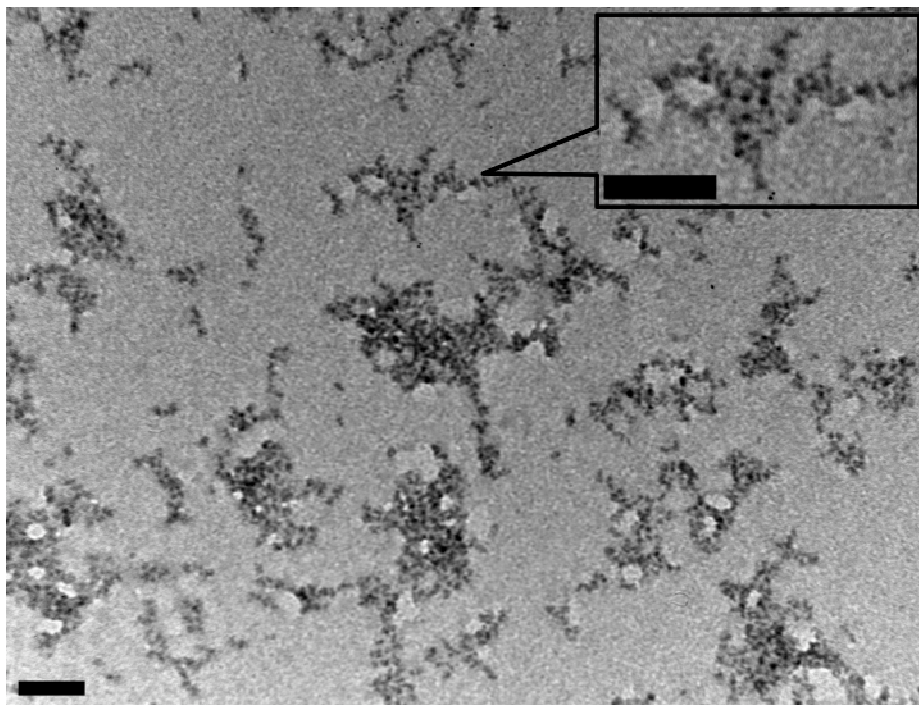

**Figure S1.** TEM image of DHLA-capped QDs [scale bar is 50 nm]. The TEM image provides evidence to the size of the DHLA-capped QDs as being  $4.4 \pm 0.6$  nm in diameter.

## UV-vis and Fluorescence Spectra for DHLA-capped QDs

UV-vis spectroscopic measurements were recorded using a Perkin Elmer Lambda 35 UV/Vis spectrophotometer (Perkin Elmer, Norwalk, CT). Fluorescence spectra were taken with a Horiba Jobin Yvon FluoroLog FL3-22 spectrofluorometer (Horiba Jobin Yvon, Edison, NJ). Both UV-vis and fluorescence sample measurements used a quartz cuvette with a 10 mm optical path length. Both UV-vis and fluorescence wavelength measurements were taken from 400-700 nm with the fluorescence measurements using an excitation wavelength of 360 nm. Emission and excitation slit widths were typically 5 nm.

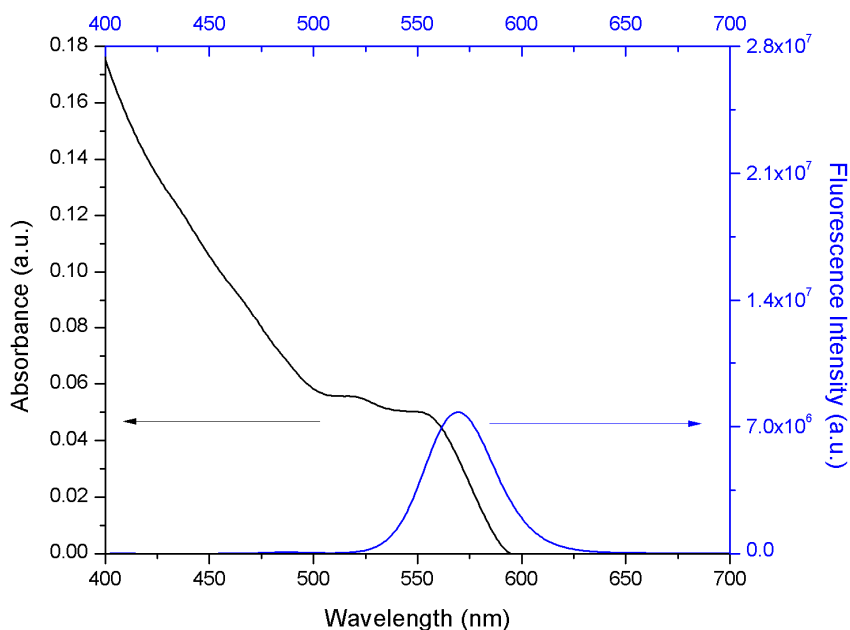

**Figure S2.** UV-vis (black) and fluorescence (blue) spectra of DHLA-capped QDs ( $5.03 \times 10^{-7}$  M). The absorption maximum is 555 nm and the emission maximum is 570 nm.

## Congo Red Absorption Differences

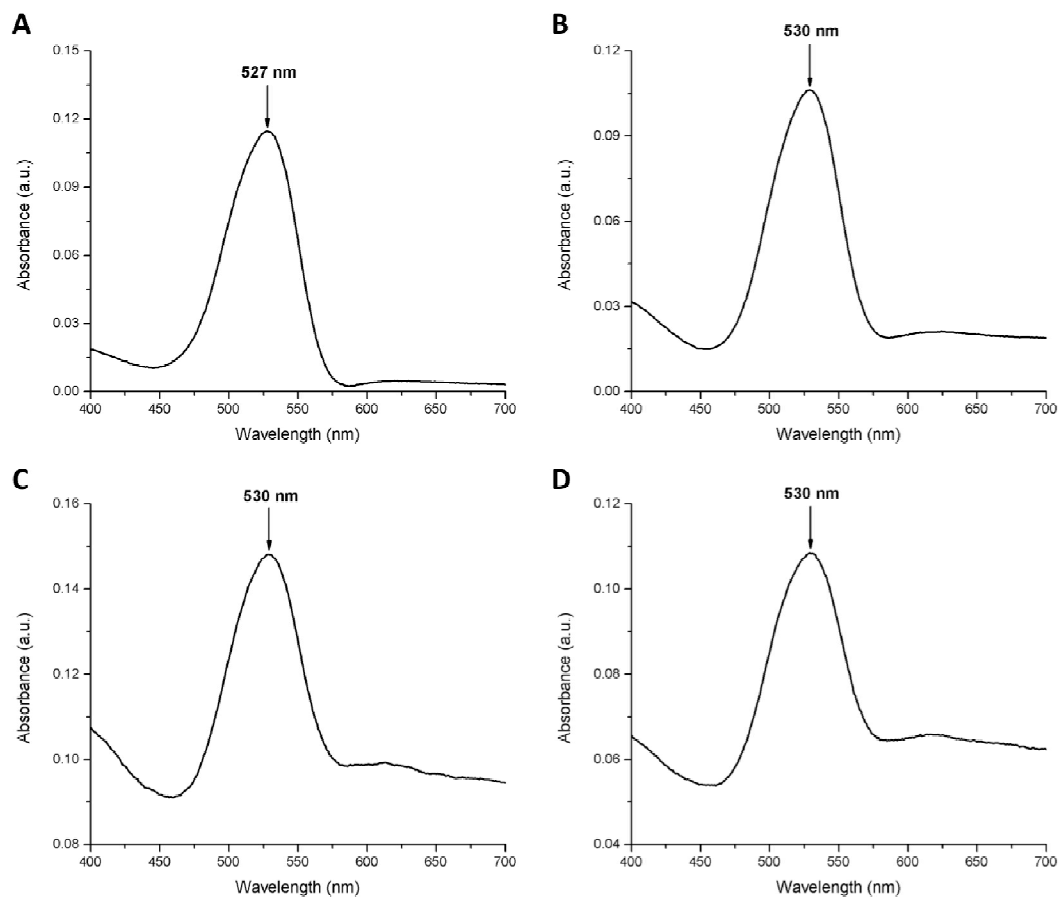

**Figure S3.** Difference in the absorption spectra for Congo red in the presence of HSA protein fibrils at 65°C and pH 7.4: (A) HSA, (B) HSA-QDs (1000:1), (C) HSA-QDs (2500:1), (D) HSA-QDs (5000:1).

## Fluorescence Spectra for Trp Fluorescence

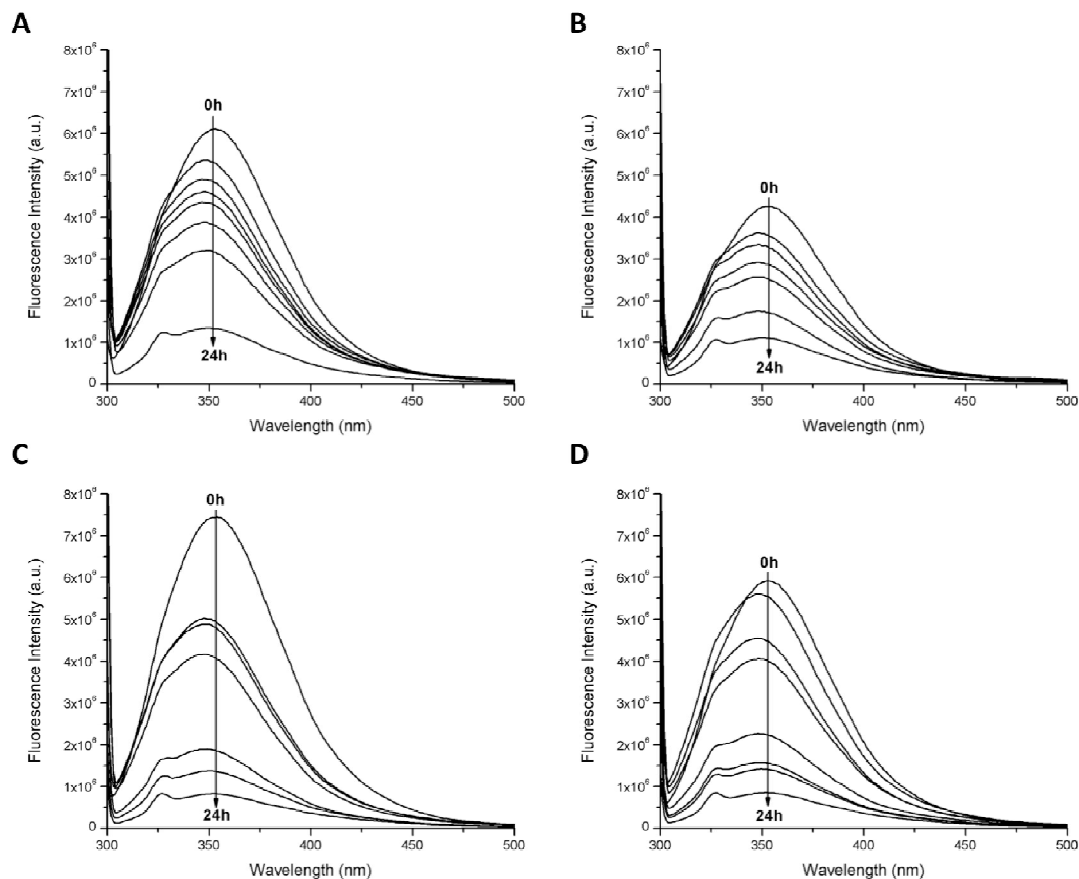

**Figure S4.** Time evolution of Trp fluorescence of HSA and HSA-QDs solutions at 65°C and pH 7.4: (A) HSA, (B) HSA-QDs (1000:1), (C) HSA-QDs (2500:1), (D) HSA-QDs (5000:1). Samples were excited at 295 nm. Emission and excitation slit widths were typically 5 nm.
